# Supplementary material for: Enhanced and Sustainable Removal of Indoor Formaldehyde by Naturally Porous Bamboo Activated Carbon Supported with MnOx: Synergistic Effect of Adsorption and Oxidation
Source: MDPI journal article supplement (doi:10.3390/molecules29030663), 2024-01-31
Supplement: s1 [file s1]

## Supplementary Material for

# Enhanced and Sustainable Removal of Indoor Formaldehyde by Naturally Porous Bamboo Activated Carbon Supported with MnO<sub>x</sub>: Synergistic Effect of Adsorption and Oxidation

Zhenrui Li <sup>1,2</sup>, Yujun Li <sup>1,2</sup>, Shijie Li <sup>1,2</sup>, Jianfeng Ma <sup>1,2</sup>, Qianli Ma <sup>1,2</sup>, Zhihui Wang <sup>1,2</sup>, Jiajun Wang <sup>1,2</sup>, Keying Long <sup>3</sup> and Xing'e Liu <sup>1,2,\*</sup>

<sup>1</sup> International Centre for Bamboo and Rattan, Beijing 100102, China; lizr@caf.ac.cn (Z.L.); liyujun0225@163.com (Y.L.); lishijie@vision-smart.com (S.L.); majf@icbr.ac.cn (J.M.); maql@icbr.ac.cn (Q.M.); frankie2499@163.com (Z.W.); wjjchina0112@163.com (J.W.)

<sup>2</sup> Key Laboratory of National Forestry and Grassland Administration/Beijing for Bamboo & Rattan Science and Technology, Beijing 100102, China

<sup>3</sup> Guangxi Zhuang Autonomous Region Forestry Research Institute, Nanning 530002, China; longky0305@163.com

\* Correspondence: liuxinge@icbr.ac.cn; Tel.: +86-139-1067-7147

The supplementary material contains 5 pages, including Tables S1-S4, and Figures

S1-S2.

## 1. Supporting Tables

**Table S1.** The Mn contents of BAC@MnO<sub>x</sub>-N (N = 1, 2, 3, 4, 5) series of catalysts.

| Samples   | BAC@MnO <sub>x</sub> -1 | BAC@MnO <sub>x</sub> -2 | BAC@MnO <sub>x</sub> -3 | BAC@MnO <sub>x</sub> -4 | BAC@MnO <sub>x</sub> -5 |
|-----------|-------------------------|-------------------------|-------------------------|-------------------------|-------------------------|
| Mn (wt.%) | 7.72                    | 8.98                    | 10.24                   | 10.44                   | 11.04                   |

**Table S2.** The integral areas values of D and G bands of BAC and series of catalysts.

| Samples                 | <i>I<sub>D</sub></i> | <i>I<sub>G</sub></i> | <i>I<sub>D</sub>/I<sub>G</sub></i> |
|-------------------------|----------------------|----------------------|------------------------------------|
| BAC                     | 417829.2             | 171227.4             | 2.44                               |
| BAC@MnO <sub>x</sub> -1 | 147776.3             | 63541.4              | 2.33                               |
| BAC@MnO <sub>x</sub> -2 | 354249.7             | 148978.5             | 2.38                               |
| BAC@MnO <sub>x</sub> -3 | 71912.9              | 31094.2              | 2.31                               |
| BAC@MnO <sub>x</sub> -4 | 51459.5              | 21352.5              | 2.41                               |
| BAC@MnO <sub>x</sub> -5 | 107913.9             | 45252.3              | 2.38                               |

**Table S3.** Binding energy of C 1s, Mn 2p<sub>3/2</sub>, and O 1s of all catalysts.

| Samples                 | Binding energy (eV)    |                        |       |                      |                  |       |                  |                   |
|-------------------------|------------------------|------------------------|-------|----------------------|------------------|-------|------------------|-------------------|
|                         | C 1s                   |                        |       | Mn 2p <sub>3/2</sub> |                  |       | O 1s             |                   |
|                         | sp <sup>2</sup><br>C=C | sp <sup>3</sup><br>C-C | C=O   | Mn <sup>3+</sup>     | Mn <sup>4+</sup> | O'    | O <sub>ads</sub> | O <sub>latt</sub> |
| BAC@MnO <sub>x</sub> -1 | 284.8                  | 285.3                  | 288.1 | 642.1                | 643.6            | 533.5 | 531.9            | 530.1             |
| BAC@MnO <sub>x</sub> -2 | 284.8                  | 285.6                  | 289.0 | 642.1                | 643.8            | 533.6 | 532.1            | 530.0             |
| BAC@MnO <sub>x</sub> -3 | 284.8                  | 285.3                  | 288.3 | 642.2                | 643.9            | 533.4 | 531.7            | 530.0             |
| BAC@MnO <sub>x</sub> -4 | 284.8                  | 285.3                  | 288.3 | 642.3                | 644.6            | 533.4 | 531.7            | 530.0             |
| BAC@MnO <sub>x</sub> -5 | 284.8                  | 285.3                  | 288.3 | 642.3                | 644.2            | 533.4 | 531.6            | 530.0             |

**Table S4.** Derived parameters for the Yoon-Nelson fitting of HCHO adsorption on BAC and all catalysts.

| Samples                 | $C_0$ (mg·m <sup>-3</sup> ) | $K_{YN}$ (min <sup>-1</sup> ) | $\tau$ (h) | $\tau_{exp}$ (h) | $R^2$ |
|-------------------------|-----------------------------|-------------------------------|------------|------------------|-------|
| BAC                     | 1.439                       | 1.518                         | 2.608      | 2.703            | 0.993 |
| BAC@MnO <sub>x</sub> -1 | 1.423                       | 0.326                         | 27.814     | 29.041           | 0.992 |
| BAC@MnO <sub>x</sub> -2 | 1.415                       | 0.116                         | 47.298     | 51.802           | 0.995 |
| BAC@MnO <sub>x</sub> -3 | 1.398                       | 0.092                         | 56.659     | 61.392           | 0.991 |
| BAC@MnO <sub>x</sub> -4 | 1.407                       | 0.088                         | 62.558     | 67.568           | 0.990 |
| BAC@MnO <sub>x</sub> -5 | 1.446                       | 0.083                         | 63.137     | 66.210           | 0.990 |

## 2. Supporting Figures

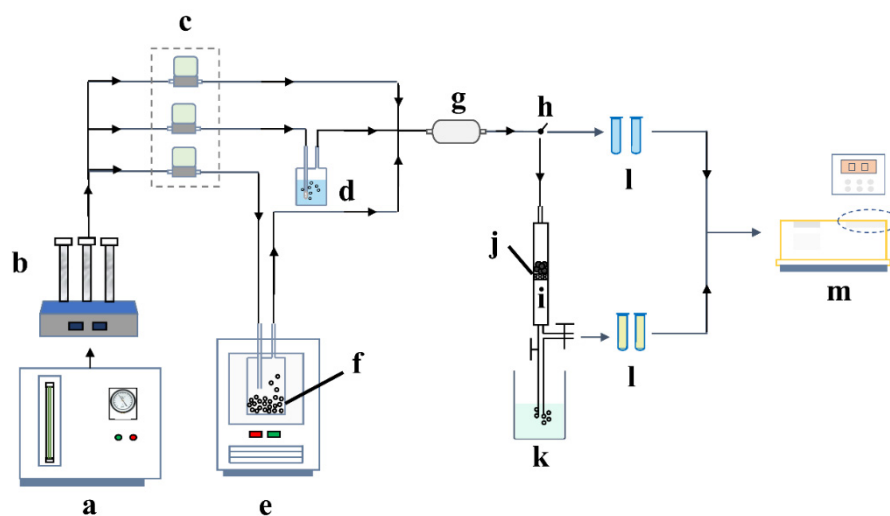

**Figure S1.** Schematic diagram of the dynamic test for HCHO adsorption: a. air compressor; b. gas dryer; c. mass flowmeter; d. bubbler (humid air); e. water bath; f. bubbler (HCHO vapor); g. gas mixing chamber; h. three-way valve; i. samples; j. quartz tube; k. tail gas treatment; l. gas gathering system; m. spectrophotometer instrument.

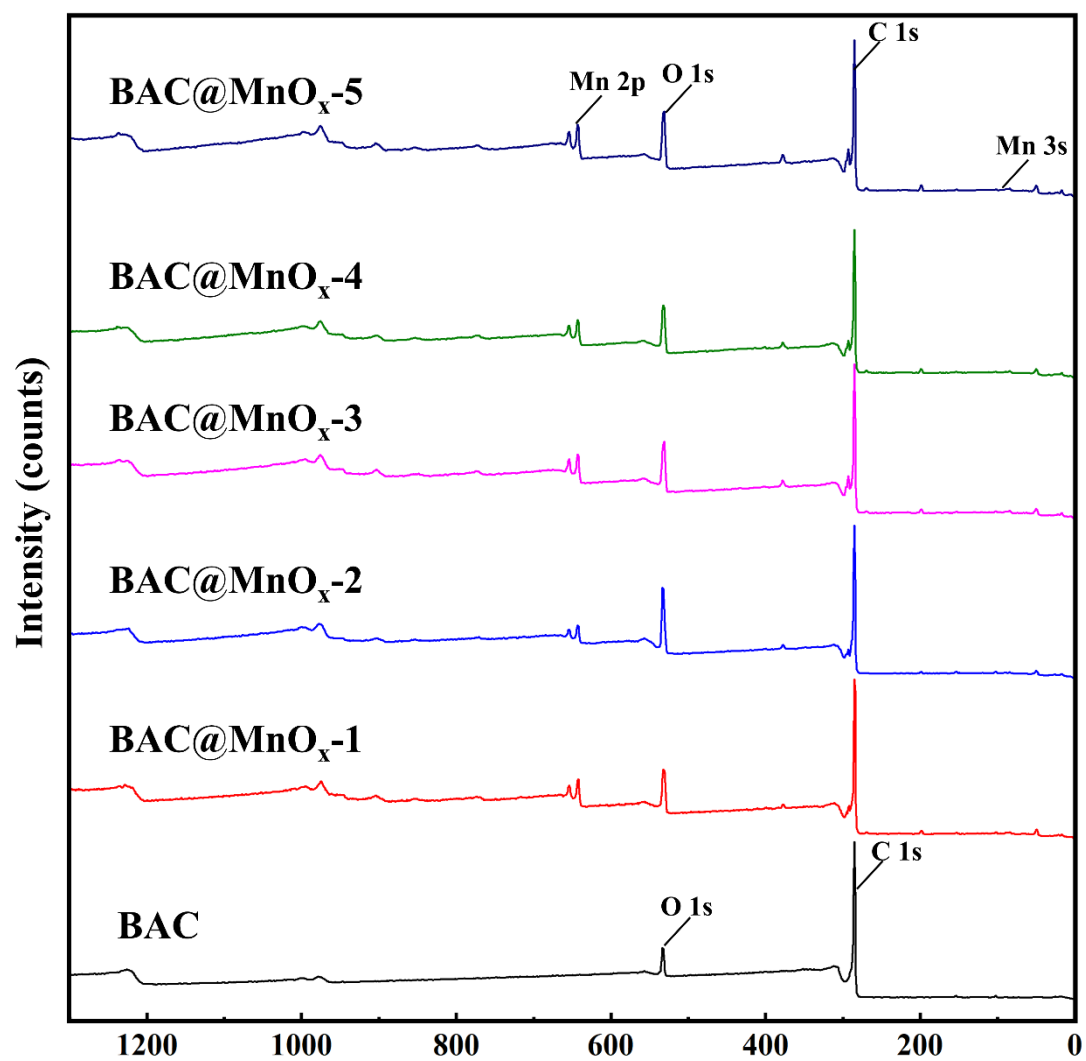

**Figure S2.** XPS spectra of full survey of BAC and series of catalysts.
